# Supplementary material for: Cilia are required for asymmetric nodal induction in the sea urchin embryo
Source: PubMed Central journal article supplement (PMC4994401; doi:10.1186/s12861-016-0128-7), 2016-08-23
Supplement: 12861_2016_128_MOESM1_ESM.pdf [file 12861_2016_128_MOESM1_ESM.pdf]

## Supplementary Information

### **Cilia are required for asymmetric *nodal* induction in the sea urchin embryo**

Matthias Tisler<sup>1</sup>, Franziska Wetzel<sup>1#</sup>, Sabrina Martino<sup>1#</sup>, Stanislav Kremnyov<sup>2</sup>,  
Thomas Thumberger<sup>1+</sup>, Axel Schweickert<sup>1</sup>, Martin Blum<sup>1</sup>, Philipp Vick<sup>1\*</sup>

## Supplementary Figures

### Supplementary Figure 1

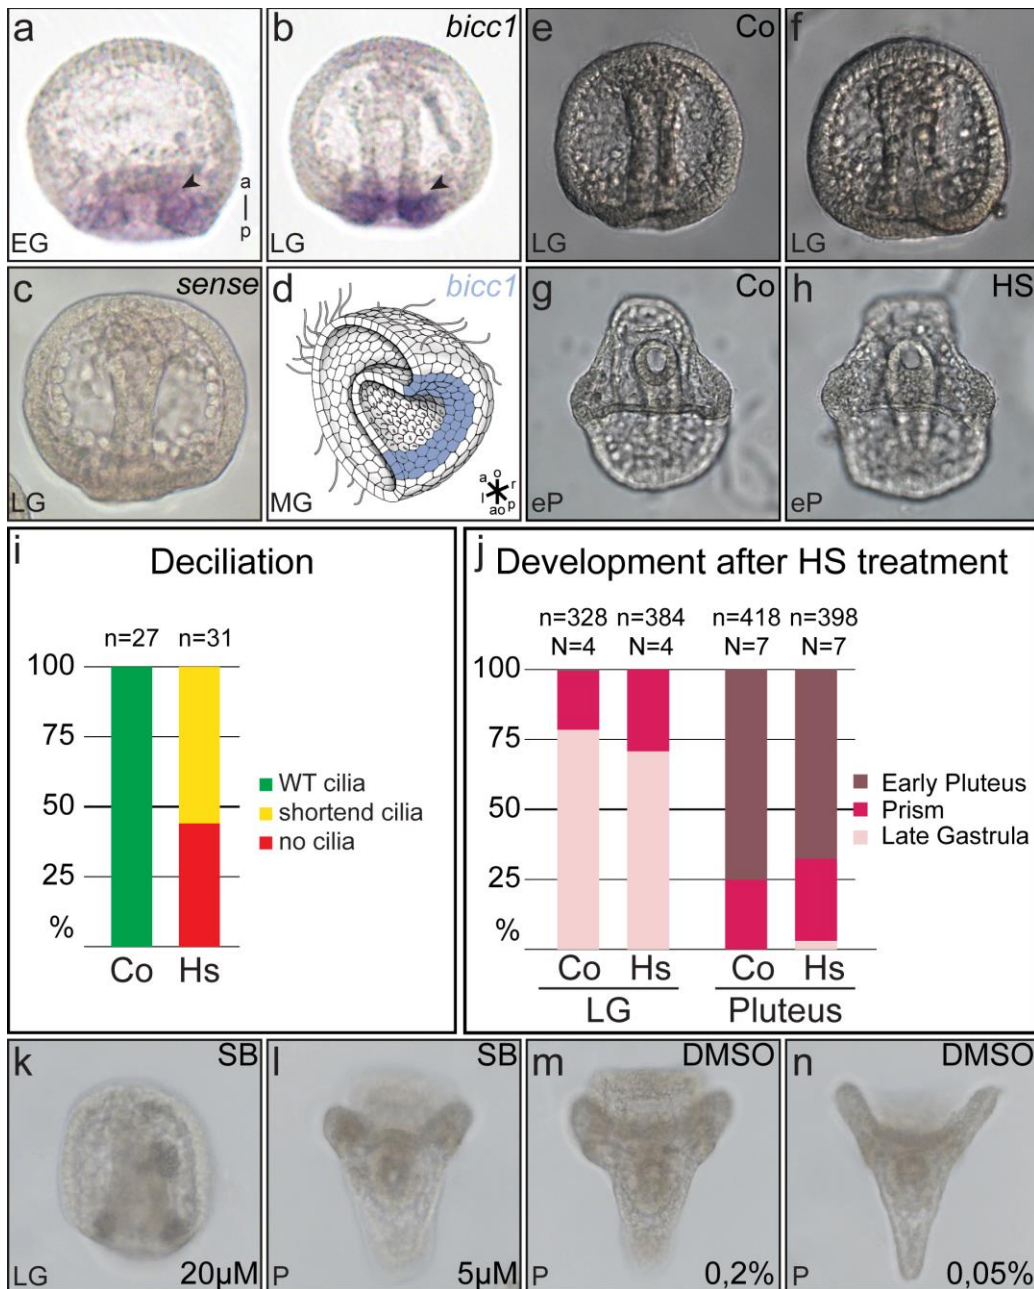

**mRNA expression of *bicc1* (a-d) and overall normal development of *Paracentrotus lividus* embryos upon high salt induced deciliation (e-j) or upon early MAPK/p38 inhibition (k-n)**

(a-d) *bicc1* transcripts were detected in the invaginating mesendodermal cells during gastrulation.

(c) A control embryo stained with sense RNA showed no staining. Embryos deciliated between late

blastula to late gastrula stages developed without apparent phenotype to late gastrula (f) or early

pluteus stage (h), respectively, as compared to control embryos (e, g). (i) Quantification of deciliation

efficiency after high salt treatment, based on assessment of IF using an antibody against acetylated

tubulin (n = number of embryos analyzed). (j) Developmental stages of wild-type and high-salt treated embryos. Summary of results from a total of 11 deciliation experiments performed at early (EG), mid (MG) or late gastrula (LG) stages and scored when most controls developed to late gastrula stage (left bars) or early pluteus stage (right bars), respectively (n = number of embryos; N = number of experiments). Please note that there was no overall delay in development after HS treatment. (k-n) Embryos after MAPK/p38 inhibition during blastula showed dose-dependent DV patterning phenotypes resembling late gastrula stages (LG) at early pluteus (P) stages (k, l) while DMSO control embryos developed normally (m, n). Drawings in (d) adapted from Blum et al. 2014<sup>1</sup>.

### Supplementary References

01. Blum, M., Feistel, K., Thumberger, T. & Schweickert, A. The evolution and conservation of left-right patterning mechanisms. *Development* **141**, 1603–1613 (2014).
